# Supplementary material for: Establishment of a novel amyotrophic lateral sclerosis patient (TARDBP N345K/+)-derived brain microvascular endothelial cell model reveals defective Wnt/β-catenin signaling: investigating diffusion barrier dysfunction and immune cell interaction
Source: Front Cell Dev Biol. 2024 Aug 15;12:1357204. doi: 10.3389/fcell.2024.1357204 (PMC11357944; doi:10.3389/fcell.2024.1357204)
Supplement: Supplementary file 2 [file Table3.XLSX]

## Sheet: Sheet1
			Supplementary table 3. Antibody list
				product name	corporation / catalog number	dilution	fixative
			For immunostaining	Anti-VE-cadherin antibody (clone F-8),	Santa Cruz Biotechnology / sc-9989	1:200	MeOH for 20 sec
				Claudin 5 Monoclonal Antibody (clone 4C3C2)	Invitrogen / 34-1600	1:200	MeOH for 20 sec
				Occludin Monoclonal Antibody (clone OC-3F10),	Invitrogen / 33-1500	1:100	MeOH for 20 sec
				Actin, Smooth Muscle Ab-1, Mouse Monoclonal Antibody (clone 1A4)	Fisher Scientific / MS113P	1:200	1% PFA
				Monoclonal Anti-Calponin antibody produced in mouse (clone hCP)	Sigma-Aldrich/ C2687	1:15000	1% PFA
				Anti-TAGLN/Transgelin (polyclonal)	Abcam / ab14106	1:1000	1% PFA
				Anti TDP-43	Proteintech / 10782-2-AP	1:100	1% PFA
				Cy3 AffiniPure F(ab’) Fragment Goat Anti-Mouse IgG, F(ab’)2 fragment	Jackson ImmunoResearch / 115-166-006	1:200
				Cy3 AffiniPure Donkey Anti-Rabbit IgG (H+L),	Jackson ImmunoResearch / 711-165-152	1:200
				Donkey Anti-Mouse IgG H&L (Alexa Fluor® 488)	Abcam / ab150105	1:200
				DAPI (4',6-Diamidino-2-Phenylindole, Dihydrochloride)	Sigma-Aldrich / D9564	1:1000
			For flow cytometry	PE anti-human CD106 Antibody	BioLegend / 305806	1:20
				PE Mouse IgG1, κ Isotype Ctrl	Biolegend / 981804	1:160
				BV421 Mouse Anti-Human CD54	BD / 564077	1:20
				BV421 Mouse IgG1, k Isotype Control	BD / 562438	1:160
